# Supplementary material for: Comparison of early-stage changes of osteoarthritis in cartilage and subchondral bone between two different rat models
Source: PeerJ. 2020 Apr 20;8:e8934. doi: 10.7717/peerj.8934 (PMC7179570; doi:10.7717/peerj.8934)
Supplement: Data S1 — (A) Modified mankin scores. (B) BV/TV. (C) Tb.Sp. (D) Tb.Th. (E) TRAP positive staining of osteoclasts. (F) Immunohistochemical staining of Col II. (G) Immunohistochemical staining of MMP13. (H) Immunohistochemical staining of Runx2 [file peerj-08-8934-s001.xlsx]

## Sheet: A. Modified mankin scores
Modified mankin scores
2 w				4 w				6 w
ACLT	CI	Sham	Saline	ACLT	CI	Sham	Saline	ACLT	CI	Sham	Saline
6	7	3	2	10	12	4	2	11	11	4	4
7	9	2	2	9	11	2	2	11	12	2	4
4	7	1	2	9	10	4	2	10	11	4	3
6	8	2	3	9	11	2	4	10	12	4	3
6	8	2	2	9	12	3	1	12	13	5	4
6	8	2	2	9	11	3	3	11	12	4	3
Notes：
ACLT : Anterior cruciate ligament transection group
CI : Collagenase-injection group
Sham : Sham-operated group
Saline : Saline group (placebo group)
2w : 2 weeks
4w : 4 weeks
6w : 6 weeks

## Sheet: B. BV-TV
BV/TV
2 w				4 w				6 w
ACLT	CI	Sham	Saline	ACLT	CI	Sham	Saline	ACLT	CI	Sham	Saline
0.148	0.126	0.159	0.165	0.17	0.095	0.148	0.152	0.183	0.153	0.162	0.171
0.124	0.11	0.148	0.155	0.165	0.09	0.145	0.16	0.175	0.141	0.147	0.16
0.1	0.097	0.132	0.13	0.145	0.085	0.133	0.152	0.165	0.13	0.141	0.153
0.122	0.11	0.146	0.154	0.161	0.088	0.143	0.152	0.173	0.138	0.15	0.156
0.097	0.09	0.128	0.12	0.141	0.087	0.132	0.15	0.155	0.128	0.138	0.155
0.153	0.131	0.163	0.167	0.176	0.094	0.15	0.162	0.178	0.152	0.164	0.18
Notes：
ACLT : Anterior cruciate ligament transection group
CI : Collagenase-injection group
Sham : Sham-operated group
Saline : Saline group (placebo group)
2w : 2 weeks
4w : 4 weeks
6w : 6 weeks

## Sheet: C. Tb.Sp
Tb.Sp
2 w				4 w				6 w
ACLT	CI	Sham	Saline	ACLT	CI	Sham	Saline	ACLT	CI	Sham	Saline
0.72	1.84	0.738	0.779	0.71	1.75	0.74	0.678	0.64	1.2	0.92	0.916
0.6	1.4	0.673	0.682	0.568	1.31	0.675	0.592	0.495	1.01	0.79	0.785
0.48	1.17	0.508	0.549	0.418	1.05	0.523	0.5	0.325	0.857	0.57	0.54
0.52	1.3	0.645	0.655	0.53	1.15	0.65	0.57	0.467	1	0.8	0.77
0.5	1.1	0.52	0.55	0.443	1	0.53	0.5	0.35	0.86	0.555	0.541
0.75	2.03	0.755	0.78	0.745	1.96	0.762	0.7	0.655	1.31	0.985	0.95
Notes：
ACLT : Anterior cruciate ligament transection group
CI : Collagenase-injection group
Sham : Sham-operated group
Saline : Saline group (placebo group)
2w : 2 weeks
4w : 4 weeks
6w : 6 weeks

## Sheet: D. Tb.Th
Tb.Th
2 w				4w				6w
ACLT	CI	Sham	Saline	ACLT	CI	Sham	Saline	ACLT	CI	Sham	Saline
0.293	0.247	0.273	0.254	0.325	0.226	0.27	0.27	0.32	0.29	0.278	0.279
0.25	0.229	0.249	0.225	0.275	0.205	0.256	0.248	0.303	0.279	0.26	0.262
0.197	0.209	0.222	0.21	0.23	0.178	0.239	0.231	0.275	0.26	0.236	0.238
0.247	0.23	0.25	0.23	0.272	0.199	0.25	0.25	0.295	0.27	0.26	0.259
0.19	0.206	0.219	0.205	0.22	0.176	0.235	0.228	0.288	0.257	0.23	0.231
0.305	0.256	0.275	0.256	0.34	0.252	0.28	0.275	0.326	0.333	0.285	0.293
Notes：
ACLT : Anterior cruciate ligament transection group
CI : Collagenase-injection group
Sham : Sham-operated group
Saline : Saline group (placebo group)
2w : 2 weeks
4w : 4 weeks
6w : 6 weeks

## Sheet: E. TRAP positive staining
TRAP positive staining of osteoclasts/mm2
2 w			4 w
ACLT	CI	control	ACLT	CI	control
65.8	32.89	13.16	17.54	19.74	15.35
74.56	21.93	15.35	26.31	17.54	17.54
35.09	21.93	10.97	24.12	15.35	10.97
Notes:
ACLT : Anterior cruciate ligament transection group
CI : Collagenase-injection group
2w : 2 weeks
4w : 4 weeks

## Sheet: F.  Col II positive staining
Col Ⅱ positive staining cells %
2 w			6 w
ACLT	CI	control	ACLT	CI	control
44.1	54.8	67.1	44.1	27.2	73.7
55.3	46.6	74.3	45.9	34.1	54
51.1	36.9	54.8	39.4	14.8	62.1
Notes:
ACLT : Anterior cruciate ligament transection group
CI : Collagenase-injection group
2w : 2 weeks
6w : 6 weeks

## Sheet: G. MMP13 positive staining 
MMP13 positive staining cells %
2 w			6 w
ACLT	CI	control	ACLT	CI	control
44.2	54.8	40	66.3	80.1	40.6
35.8	50.9	39	69.5	69.3	34.6
47.2	46.6	32.4	62.2	67.2	46.5
Notes:
ACLT : Anterior cruciate ligament transection group
CI : Collagenase-injection group
2w : 2 weeks
6w : 6 weeks

## Sheet: H.  Runx2 positive staining
Runx2 positive staining cells %
2 w			6 w
ACLT	CI	control	ACLT	CI	control
12.8	13.1	6.5	29.7	24.7	8.2
22.5	20	5.7	43.5	24.8	5.5
17.4	26.4	8.1	45.4	26.7	7.5
Notes:
ACLT : Anterior cruciate ligament transection group
CI : Collagenase-injection group
2w : 2 weeks
6w : 6 weeks
